## Human skeletal muscle biochemical diversity

Timothy F. Tirrell, Mark S. Cook, J. Austin Carr, Evie Lin, Samuel R. Ward and Richard L. Lieber

10.1242/jeb.077347

There was an error published in *J. Exp. Biol.* **215**, 2551-2559.

In Fig. 3D, the scale for the *x*-axis was incorrect. The correct version is given below.

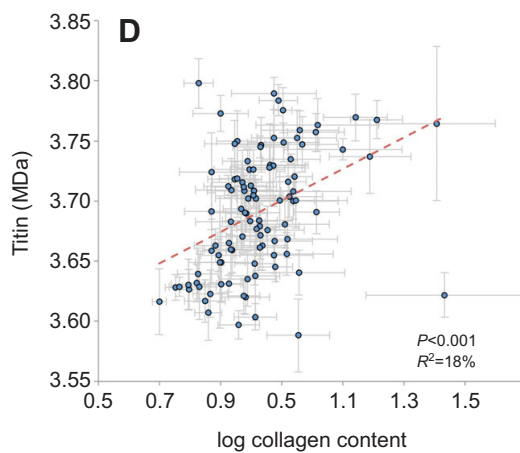

We apologise to the authors and readers for any inconvenience caused.
